# Supplementary material
Source: PubMed Central journal article supplement (PMC4326576)
Supplement: cdd2014174x1.pdf [file cdd2014174x1.pdf]

## Supplemental Information

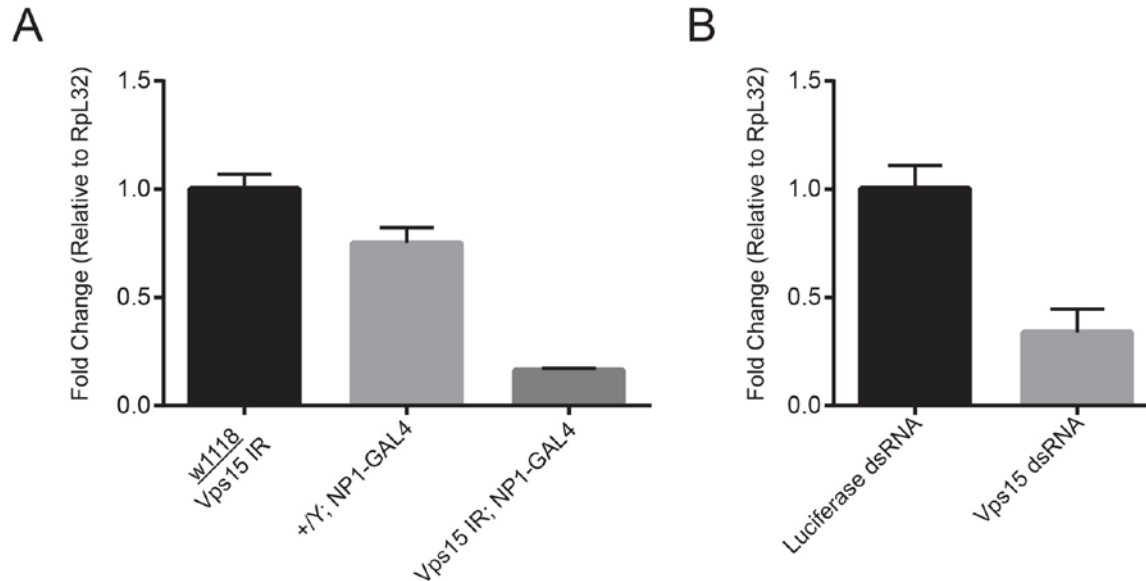

**Figure S1. Vps15 Knockdown Efficiency.** Knockdown of *Vps15* was analyzed via RT-PCR. (A) *Vps15* mRNA levels from larval intestines with undriven UAS-*Vps15* IR, NP1-GAL4 driver only, or driven knock down of *Vps15* IR were determined and normalized to *Rpl32* as a reference gene. (B) *Vps15* mRNA levels from pGFP-Atg8a S2R+ cells soaked with dsRNA targeting either luciferase (control) or *Vps15*. *Vps15* levels were normalized to *Rpl32* as a reference gene. In both cases, similar results were obtained using *Vps15* primers targeting a different region of the transcript as well as using *GAPDH* as the reference gene.

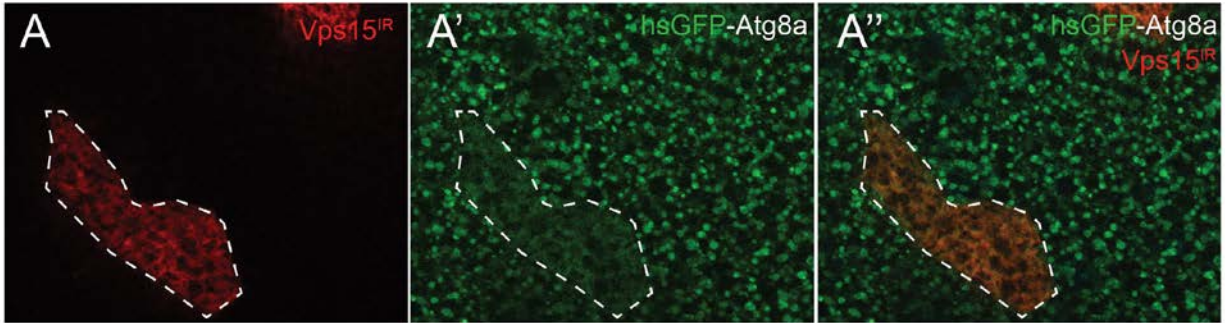

**Figure S2. An additional RNAi line shows that *Vps15* is required for starvation induced autophagy in the *Drosophila* fat body. (A-A'')** Fat body was dissected from feeding third instar larvae starved for 4 h by feeding 20% sucrose. hs-GFP punctae reflect starvation-induced autophagosome formation in control (dsRed-negative) larval fat body cells, whereas the lack of puncta formation reflects a defect in autophagy in *Vps15<sup>R</sup>* expressing (dsRed-positive) fat body cells.

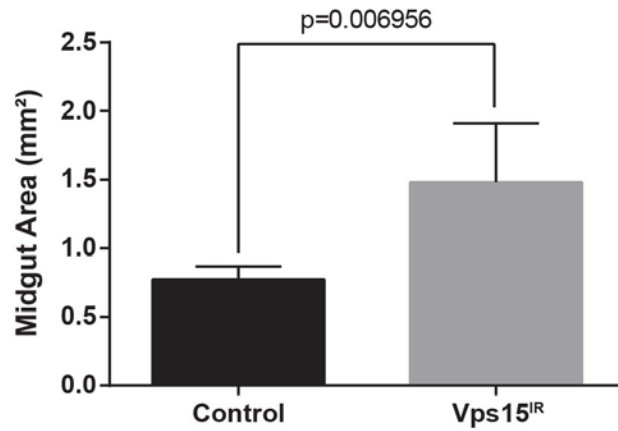

**Figure S3. *Vps15* is necessary for efficient midgut degradation.** Midguts were dissected from control (*Vps15*<sup>IR</sup> that is not expressed) or *Vps15* IR-expressing larvae 2h APF. The area of the guts was measured (n=5) using the AxioVision software and quantification is shown as mean +/- s.d.
